# Supplementary material
Source: PubMed Central journal article supplement (PMC4907192)
Supplement: AEM.00881-16_zam999117240so1.pdf [file AEM.00881-16_zam999117240so1.pdf]

# **Activation of an Otherwise Silent Xylose Metabolic Pathway in *Shewanella oneidensis***

## **Supporting information**

**Ramanan Sekar<sup>1</sup>, Hyun Dong Shin<sup>1</sup> and Thomas J. DiChristina<sup>1\*</sup>**

<sup>1</sup>School of Biology, Georgia Institute of Technology, Atlanta, GA 30332, United States

**Submitted to:** Applied and Environmental Microbiology

**Initial submission date:** 19 March 2016

**Revised submission date:** 18 April 2016

## **AUTHOR INFORMATION**

\* Corresponding author

**Email address:** [thomas.dichristina@biology.gatech.edu](mailto:thomas.dichristina@biology.gatech.edu)

**Phone:** 404-894-8419

**Fax:** 404-385-4440

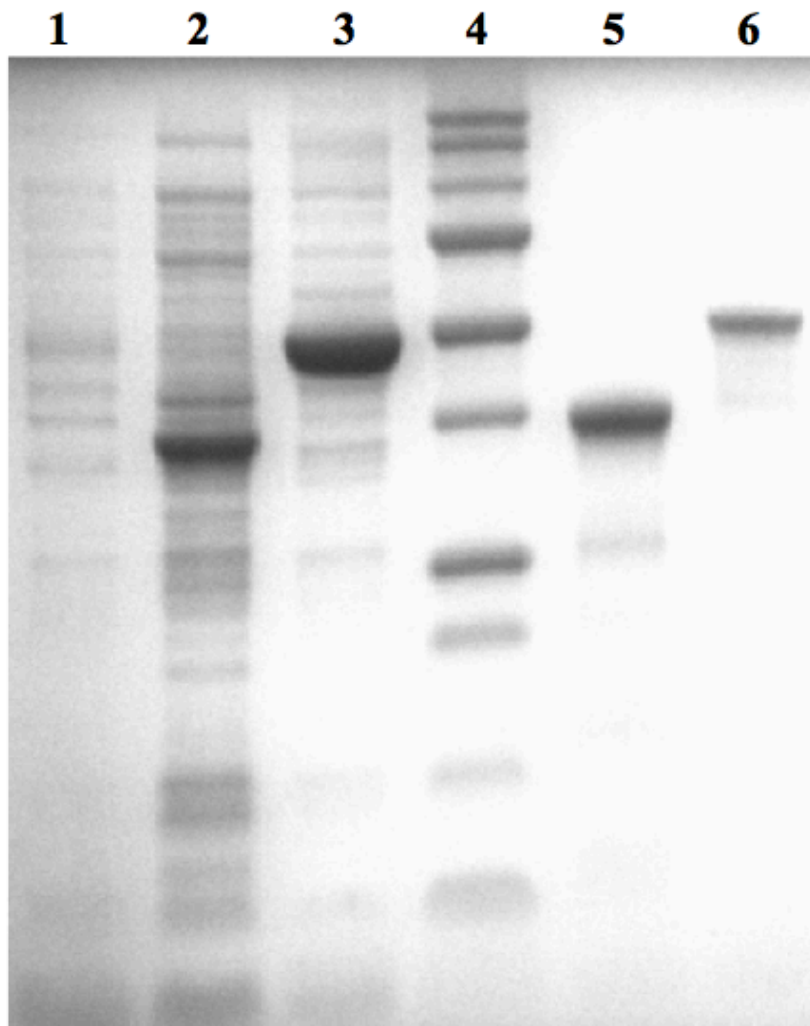

**Fig. S1.** SDS-PAGE for expression of recombinant SO\_0900 & SO\_4230 from *E. coli* JM109. Each lane was loaded with 20 g protein. Lanes: 1, Empty pQE80L plasmid crude; 2, SO\_0900 crude; 3, SO\_4230 crude; 4, MW marker; 5, SO\_0900 pure; 6, SO\_4230 pure.

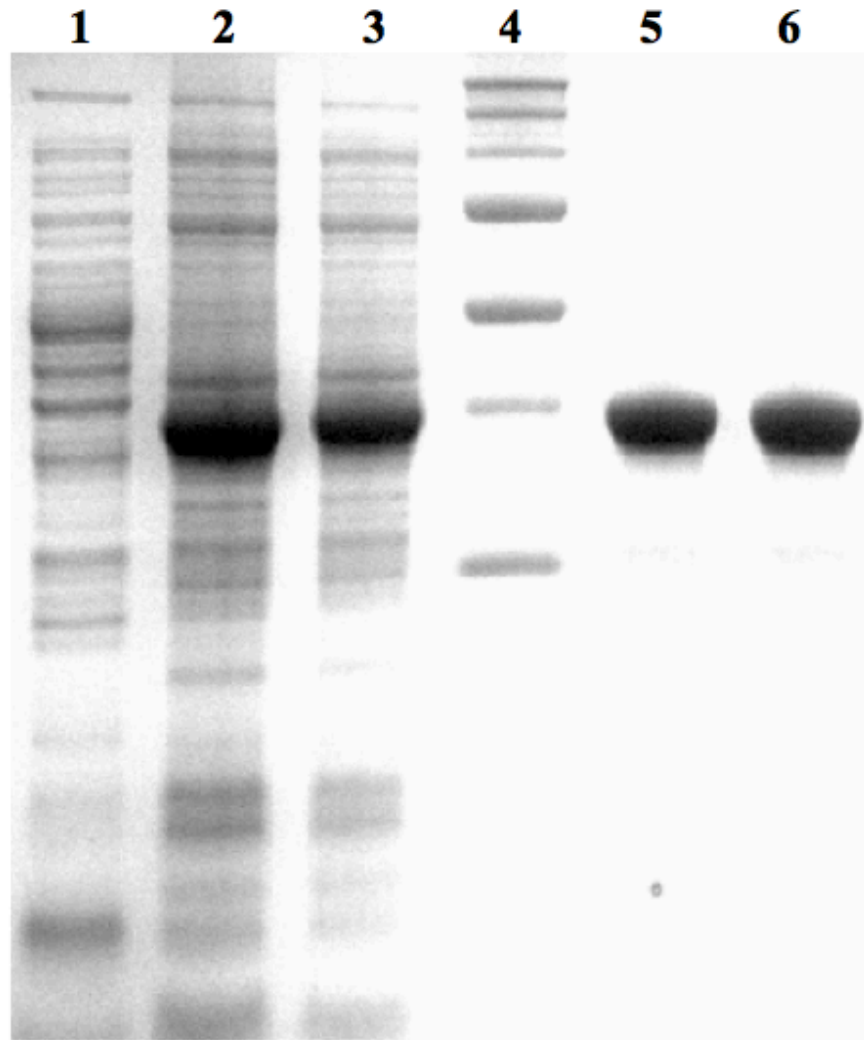

**Fig. S2.** SDS-PAGE for expression of recombinant SO\_4673 & SO\_2452 from *E. coli* JM109. Each lane was loaded with 20 g protein. Lanes: 1, Empty pQE80L plasmid crude; 2, SO\_4673 crude; 3, SO\_2452 crude; 4, MW marker; 5, SO\_4673 pure; 6, SO\_2452 pure.

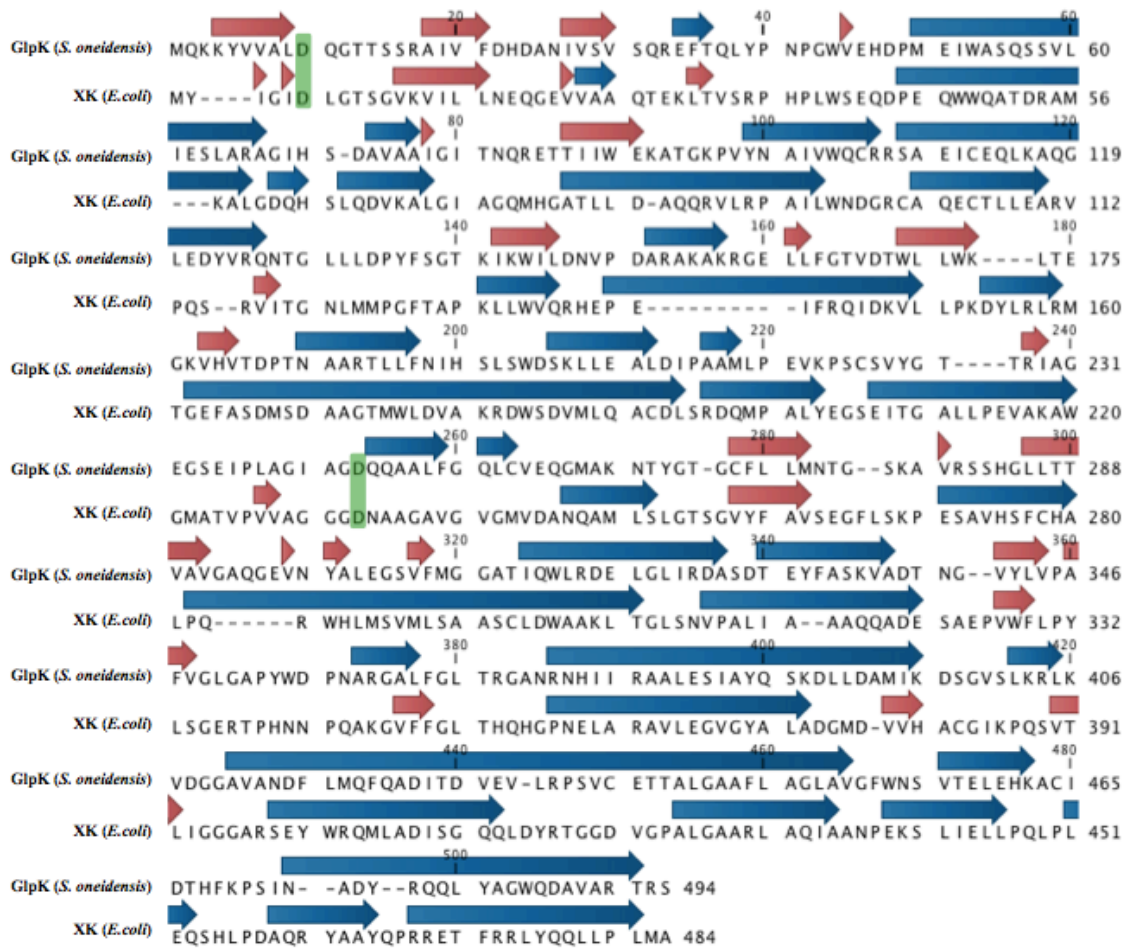

**Fig. S3.** Pairwise sequence alignment of glycerol kinase (from *S. oneidensis*) and xylulokinase (from *E. coli*). Blue arrows indicate alpha helix and red arrows indicate beta strands. Green shades indicate homologous residues Asp10, Asp244 (GlpK - *S. oneidensis*) and Asp6, Asp233 (XK - *E. coli*).

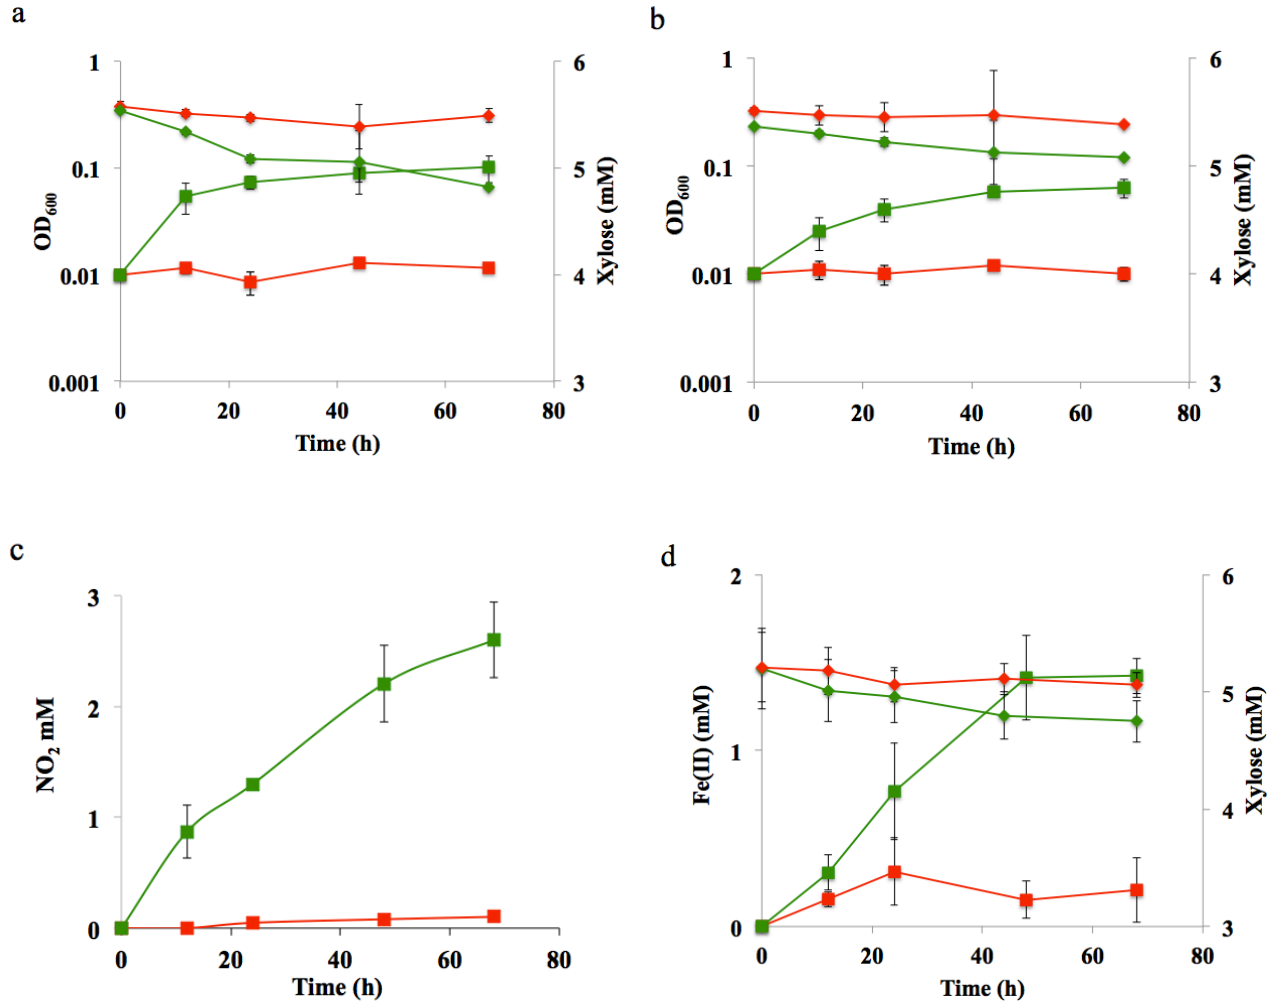

**Fig S4.** Anaerobic respiratory activities of strain XM1 with xylose as sole carbon and energy source. **(a)** Growth and xylose concentration profiles of *S. oneidensis* and strain XM1 in the presence of fumarate as electron acceptor in minimal media. 5 mM xylose and 10 mM fumarate were used in this experiment. Wild type; red, XM1; green,  $OD_{600}$ ; (■), xylose concentration; (◆). **(b)** Growth and xylose concentration profiles of *S. oneidensis* and strain XM1 in the presence of nitrate ( $NO_3$ ) as electron acceptor in minimal media. 5 mM xylose and 5 mM nitrate were used in this experiment. Wild type; red, XM1; green,  $OD_{600}$ ; (■), xylose concentration; (◆). **(c)** Nitrite concentration profiles during growth curve of *S. oneidensis* and strain XM1 in the presence of  $NO_3$  as electron acceptor in minimal media. 5 mM xylose and 5 mM nitrate were used in this experiment. Wild type; red (■), XM1; green (■). **(d)** Fe(II) and xylose concentration profiles during growth curve of *S. oneidensis* and strain XM1 in the presence of Fe(III) as electron acceptor in minimal media. 5 mM xylose and 10 mM Fe(III) were used in this experiment. Wild type; red, XM1; green, Fe(II); (■), xylose concentration; (◆). Error bars represent range of errors in duplicate batch reactors

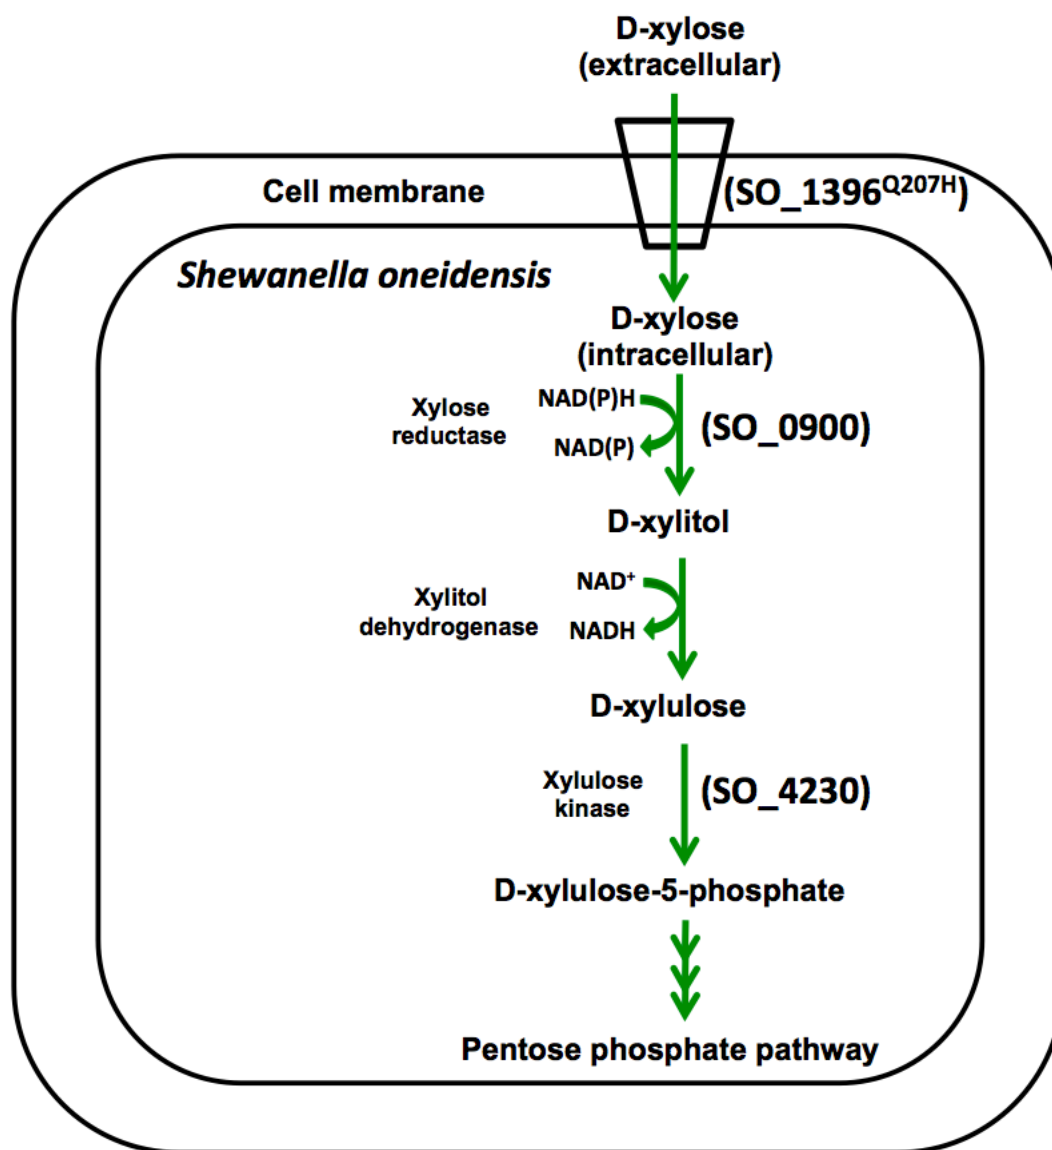

**Fig. S5.** Working model of the xylose metabolic pathway in strain XM1, including putative xylose transporter SO\_1396<sup>Q207H</sup>, putative xylose reductase SO\_0900, and putative xylulose reductase SO\_4230 identified in the present study



Fig. S6.

```
Amazonensis 1 INIIFMGNSLBEGYIPTIPAAASDVPLEVFSRLLLEGRFISLFLMLFGVGLVIQYQRF---
Woodyi 1 MNIYFNGNAVSGYASHEISPFHDTLVELFSNFFLEGRFISLFLMLFGVGLVQFNRYSKQ
Piezotolerans 1 MNIYFNGNSFSGYANHETVPEHDTVIMLFSNFFLEGRFISLFLSMLFGVGLAIQYQNKLSAL
Haliotis 1 LNVSEFMGVTELYGAPFPEFHLDATITETLSNFFLEGRFISLFLSMLFGVGLMIQQQNFBAR
Algae 1 LNVSEFMGVTELYGAPFPEFHLDATITETLSNFFLEGRFISLFLSMLFGVGLMIQQQNFBAR
Frigidimarina 1 LNIYFMGNSEFSGYAPHEVQPTSDIILDFSNFFLEGRFISLFLSMLFGVGLMIQYQR-QQM
W3-18-1 1 MNIYFMGISFYGYAPHEMPELSDHEIKVFNHFFIEGRFISLFLSMLFGVGLMIQYQRFSAK
Putrefaciens 1 MNIYFMGIIFSGYAPHEQPLSDHEIKVFSNFFIEARFISLFLSMLFGVGLMIQYQRFSAK
Baltica 1 MNIYFMGIIFSGYAPHEQPLSDHEIKVFSNFFIEARFISLFLSMLFGVGLMIQYQRFSAK
MR-1 1 MNIYFMGISFYGYAPHQIPLLMDQILOTFSNFFIEGRFISLFLSMLFGVGLMIQYQRFTAK
XM1 1 MNIYFMGISFYGYAPHQIPLLMDQILOTFSNFFIEGRFISLFLSMLFGVGLMIQYQKFTAK
ANA-3 1 MNIYFMGISFYGYAPHQIPLLSDQVLEAFSNFFIEGRFISLFLSMLFGVGLMIQYQRFSDK
MR-4 1 MNIYFMGISFYGYAPHQIQLLSDQVLEAFSNFFIEGRFISLFLSMLFGVGLMIQYQRFSDK
MR-7 1 MNIYFMGISFYGYAPHQIPLLSDQVLEAFSNFFIEGRFISLFLSMLFGVGLMIQYQRFSDK
consensus 1 .....*.....*.....*.....*.....*.....*.....*.....*.....*.....*.....

Amazonensis 58 -GQVEP-----IKRRLKLLMLFGLLHGIEIWPGDVLLSYGSLAMVALRYLDAPLDHIIH
Woodyi 61 NIDRAYKQ-----IKSRLKWLIVFGAVHGVIVWISGDVLFAYGLSGFLALCYLKLQNKLI
Piezotolerans 61 DGARYQT-----MKSRLKWLIVFGVIHGIEIWYGDILETYALGGFLALCYLQDNKKLL
Haliotis 61 GLEPEPL-----IRSRLKWLIVFGALHSLFIWPGDILLTYISICGFLAWHYRNLEIQAQQ
Algae 61 GLEPEPL-----IRSRLKWLIVFGALHSLFIWPGDILLTYISICGFLAWHYRNLEIQAQQ
Frigidimarina 60 GMDTATTSQRNKRIRKRLNWLIAFGVIHAFIEIPGDILLTYGVSGLAERYINLSADELI
W3-18-1 61 GLNAYPL-----LRSRLKWLIVFGLIHGIIWPGDILFTYISGFLALCYKDLISIGELK
Putrefaciens 61 GLEAYSL-----LRSRLKWLIVFGLIHGIEIWSGDILETYISGFLALCYKDLISVBAIK
Baltica 61 GLEAYPL-----LRSRLKWLIVFGLIHGIIWPGDILLTYISGFLALCYKDLISVBAIK
MR-1 61 GLAAYPL-----LRSRLKWLIVFGLIHGIIWISGDILLTYISGFLALCYRDIITIAEQK
XM1 61 GLAAYPL-----LRSRLKWLIVFGLIHGIIWISGDILLTYISGFLALCYRDIITIAEQK
ANA-3 61 GLEAYSL-----LRSRLKWLIVFGLIHGIIWPGDILLTYISGFLALCYRDASIAELK
MR-4 61 GLAAYSL-----LRSRLKWLIVFGLIHGIIWPGDILLTYISGFLALCYRDASIAELK
MR-7 61 GLAAYSL-----LRSRLKWLIVFGLIHGIIWPGDILLTYISGFLALCYRDASIAELK
consensus 61 .. ..*.....*.....*.....*.....*.....*.....*.....*.....*.....*.....

Amazonensis 110 KRALQELGFSALVMLLLTQALPTEPLPSRLSPEYQASLAPWIGPYLGOVLDHLLAMMLMIF
Woodyi 115 KKSLEFI-AISVFTFTLESIFSPSEERIRGSELFESEBYLIWFSIYSEQLLMQEVFITEL
Piezotolerans 115 KKSIFIFI-TLPLFIFAITISIFSPSEAIIRGSAQFEDLSIWSGIYSGQLMMQLIIFTGML
Haliotis 115 RRALDFI-AIGTDAYGLMIFLPGDETIRGNVLFNEQYSAWTGSYGEQLLMHLEFMTLLML
Algae 115 RRALDFI-AIGTDAYGLMIFLPGDETIRGNVLFNEQYSAWTGSYGEQLLMHLEFMTLLML
Frigidimarina 120 RKAKWFI-FLSEFETALISLMPDQVYRDSAFFEQLAAWTGSYQQQLFLHLIMFAYML
W3-18-1 115 RKANIFI-FGALVITLVLVSLGSDPEFTRESSLFAEQYSAWTSSYADQLFLHLMQVGYMA
Putrefaciens 115 RKANIFI-LSALVITLVLVSLGSDPEFTRESSLFAEQYSAWTSSYADQLFLHLMQVGYMA
Baltica 115 RKANIFI-LSALVITLVLVSLGSDPEFTRESSLFAEQYSAWTSSYADQLFLHLMQVGYMA
MR-1 115 RKANIFI-FMSLVITCLLALSGSDELFRESAFFAEQYSAWTSSYENQLLHLIQVGYDA
XM1 115 RKANIFI-FMSLVITCLLALSGSDELFRESAFFAEQYSAWTSSYENQLLHLIQVGYDA
ANA-3 115 RKANIFI-FSSLVITCLISLNGSDELFRESPLFAEQYSAWTSSYANQLFLHVMQVGYMA
MR-4 115 RKANIFI-FSSLVITCLISLNGSDELFRESPLFAEQYSAWTSSYANQLFLHVMQVGYMA
MR-7 115 RKANIFI-FSSLVITCLISLNGSDELFRESPLFAEQYSAWTSSYENQLFLHVMQVGYMA
consensus 121 .....*.....*.....*.....*.....*.....*.....*.....*.....*.....*.....

Amazonensis 170 LVMLPITALLWYIDGMMLLGMVLYRSHFFNEGLTDAARIRLRLLEALLLGAVDLTLFYFSESER
Woodyi 174 FF-IPPTLMWFTAGLMLLGVLYRKGIFQGGFSKRHLIWFALASIFFSTLDSLLSFSENP
Piezotolerans 174 FI-IPPTLMWFTAGLMLLGVLYRKKVFEKGLTQRQLLQLLATIILLSALDSACTLATNP
Haliotis 174 IS-IPFTLLWFVSGVMLLGLISLYRRGFEDQGLPQGNLQKLLALSLLSLADTILSLQSRP
Algae 174 IS-IPFTLLWFVSGVMLLGLISLYRRGFEDQGLPQGNLQKLLALSLLSLADTILSLQTRP
Frigidimarina 179 AV-IPPTLMWFTAGLMLLGMALYKRNIFVDGLDNKTLMOCVFAWTLASLDSILSLSGNQ
W3-18-1 174 LV-IPPTLMWFTAGLMLLGMALYQGGFERGFSSVLVKLVLASVTLSSLDLTVLGLTKNF
Putrefaciens 174 LV-IPPTLMWFTAGLMLLGMALYQGGFERGFSSVLVKLVLASVTLSSLDLTVLGLTKNF
Baltica 174 LV-IPPTLMWFTAGLMLLGMALYQGGFERGFSSVLVKLVLASVTLSSLDLTVLGLTKNF
MR-1 174 LA-IPPTLMWFTAGLMLLGMALYRQGFEBEGFNNTLLKLLALASLVLSLMDTLGLTQNP
XM1 174 LA-IPPTLMWFTAGLMLLGMALYRQGFEBEGFNNTLLKLLALASLVLSLMDTLGLTQNP
ANA-3 174 LV-IPPTLMWFTAGLMLLGMALYRQGSFEBEGFNNTLLKLVLASLVLSALDITLLSLTONP
MR-4 174 LV-IPPTLMWFTAGLMLLGMALYRQGSFEBEGFNNTLLKLVLASLVLSALDITLLSLTONP
MR-7 174 LV-IPPTLMWFTAGLMLLGMALYRQGSFEBEGFNNTLLKLVLASLVLSALDITLLSLTONP
consensus 181 .....*.....*.....*.....*.....*.....*.....*.....*.....*.....*.....
```

**Fig. S6 (continued)**

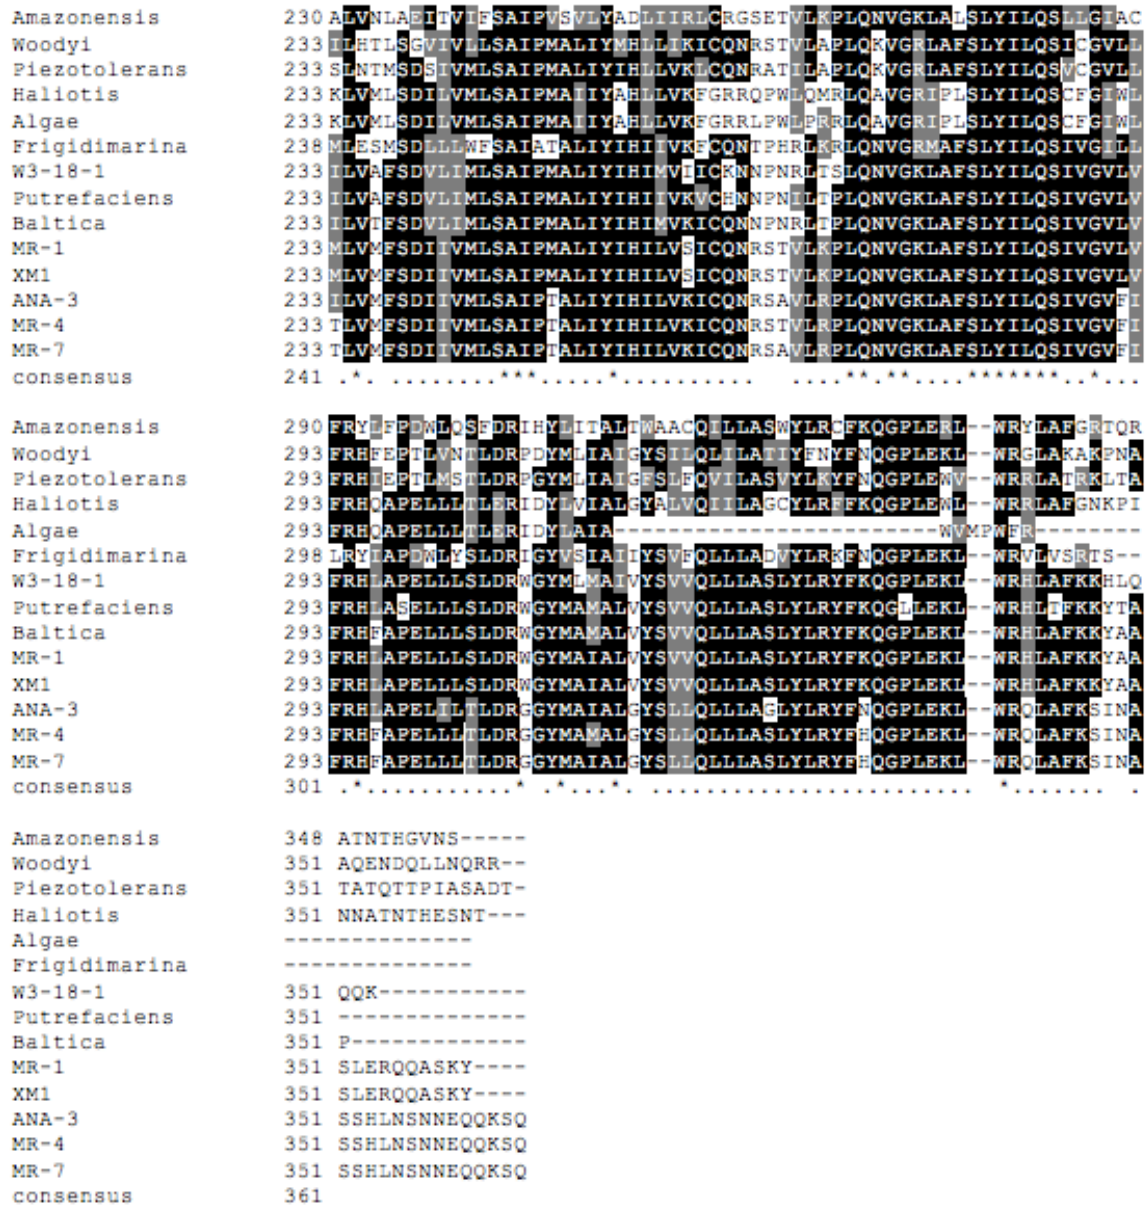

**Fig. S6.** Multiple sequence alignments generated by ClustalW analysis of *S. oneidensis* MR-1 SO\_1396 homologs identified in the genomes of 14 *Shewanella* strains. Black shades indicate identity and gray shades indicate similarity.



**Table S1.** Composition of SM medium

| Compound                                            | Concentration (mM) |
|-----------------------------------------------------|--------------------|
| Potassium Phosphate                                 | 10                 |
| NH <sub>4</sub> SO <sub>4</sub>                     | 15                 |
| MgSO <sub>4</sub> ·7H <sub>2</sub> O                | 1                  |
| CaCl <sub>2</sub> ·2H <sub>2</sub> O                | 0.48               |
| EDTA, disodium salt                                 | 0.67               |
| FeSO <sub>4</sub> ·7H <sub>2</sub> O                | 0.1                |
| NaHCO <sub>3</sub>                                  | 0.2                |
| FeCl <sub>3</sub>                                   | 0.1                |
| Na <sub>2</sub> SeO <sub>4</sub>                    | 0.01               |
| H <sub>3</sub> BO <sub>3</sub>                      | 0.05               |
| ZnSO <sub>4</sub> ·7H <sub>2</sub> O                | 0.005              |
| Na <sub>2</sub> MoO <sub>4</sub> ·2H <sub>2</sub> O | 0.007              |
| CuSO <sub>4</sub> ·5H <sub>2</sub> O                | 0.001              |
| MnSO <sub>4</sub> ·H <sub>2</sub> O                 | 0.001              |
| CoSO <sub>4</sub> ·7H <sub>2</sub> O                | 0.05               |
| NiCl <sub>2</sub> ·6H <sub>2</sub> O                | 0.08               |
| NaCl                                                | 0.1                |

**Table S2.** Blast analysis of SO\_0900

|                                         | Protein/locus tag   | Organism                              | Size (aa) | Identity (%) | Similarity (%) | e-value | Coverage (%) | Function            |
|-----------------------------------------|---------------------|---------------------------------------|-----------|--------------|----------------|---------|--------------|---------------------|
|                                         | SO_0900 (Template)  | <i>S. oneidensis</i> MR-1             | 346       |              |                |         |              | Aldo/keto reductase |
| Top 3 hits in <i>Shewanella sp</i>      | SOHN41_00409        | <i>Shewanella sp.</i> HN-41           | 346       | 97           | 98             | 0       | 100          | Aldo/keto reductase |
|                                         | Shewmr4_0747        | <i>Shewanella sp.</i> MR-4            | 346       | 98           | 99             | 0       | 100          | Aldo/keto reductase |
|                                         | Shewmr7_3273        | <i>Shewanella sp.</i> MR-7            | 346       | 99           | 99             | 0       | 100          | Aldo/keto reductase |
|                                         | AALB_3252           | <i>Agarivorans albus</i> MKT 106      | 346       | 67           | 81             | 2.E-172 | 100          | Oxidoreductase      |
| Top 3 hits outside <i>Shewanella sp</i> | VIBNISFn118_7600 19 | <i>Vibrio nigripulchritudo</i> SFn118 | 344       | 66           | 80             | 8.E-166 | 100          | Aldo/keto reductase |
|                                         | JV59_36730          | <i>Vibrio coralliilyticus</i>         | 344       | 65           | 78             | 4.E-160 | 100          | Aldo/keto reductase |
| Known D-xylose reductases               | ECs0473             | <i>Escherichia coli</i>               | 324       | 31           | 51             | 7.E-44  | 96           | Xylose reductase    |
|                                         | XylR                | <i>Candida tenuis</i>                 | 322       | 33           | 60             | 4.E-10  | 32           | Xylose reductase    |
|                                         | ZMO0976             | <i>Zymomonas mobilis</i>              | 340       | 32           | 48             | 5.E-29  | 67           | Aldo/keto reductase |

**Table S3.** Blast analysis of SO\_4673

|                                         | Protein/locus tag  | Organism                             | Size (aa) | Identity (%) | Similarity (%) | e-value | Coverage (%) | Function                    |
|-----------------------------------------|--------------------|--------------------------------------|-----------|--------------|----------------|---------|--------------|-----------------------------|
|                                         | SO_4673 (Template) | <i>S. oneidensis</i> MR-1            | 341       |              |                |         |              | L-threonine 3-dehydrogenase |
| Top 3 hits in <i>Shewanella sp</i>      | AEA42_15490        | <i>Shewanella sp.</i> Sh95           | 341       | 99           | 99             | 0       | 100          | L-threonine 3-dehydrogenase |
|                                         | SOHN41_00043       | <i>Shewanella sp.</i> HN-41          | 341       | 99           | 99             | 0       | 100          | L-threonine 3-dehydrogenase |
|                                         | Sputcn32_3902      | <i>S. putrefaciens</i> CN-32         | 341       | 99           | 99             | 0       | 100          | L-threonine 3-dehydrogenase |
| Top 3 hits outside <i>Shewanella sp</i> | VO69_19065         | <i>Aeromonas salmonicida</i>         | 342       | 89           | 94             | 0       | 100          | L-threonine 3-dehydrogenase |
|                                         | ERIG_03807         | <i>Escherichia fergusonii</i> B253   | 341       | 89           | 94             | 0       | 100          | L-threonine 3-dehydrogenase |
|                                         | SARI_03933         | <i>Salmonella enterica</i>           | 341       | 88           | 94             | 0       | 100          | L-threonine 3-dehydrogenase |
| Known D-xylitol dehydrogenases          | AGROH133_13378     | <i>Agrobacterium sp.</i> H13-3       | 345       | 28           | 46             | 4.E-35  | 89           | Xylitol dehydrogenase       |
|                                         | L230_07742         | <i>Staphylococcus aureus</i> CBD-635 | 341       | 22           | 40             | 7.E-06  | 92%          | Xylitol dehydrogenase       |
|                                         | N42_2157           | <i>Lactococcus lactis</i>            | 341       | 20           | 42             | 6.E-07  | 76%          | Xylitol dehydrogenase       |

**Table S4.** Blast analysis of SO\_2452

|                                         | Protein/locus tag  | Organism                       | Size (aa) | Identity | Similarity | e-value | Coverage | Function                                                 |
|-----------------------------------------|--------------------|--------------------------------|-----------|----------|------------|---------|----------|----------------------------------------------------------|
|                                         | SO_2452 (Template) | <i>S. oneidensis</i> MR-1      | 314       |          |            |         |          | alcohol dehydrogenase (zinc containing)                  |
| Top 3 hits in <i>Shewanella sp</i>      | AWJ07_20235        | <i>S. frigidimarina</i>        | 335       | 29%      | 47%        | 9.E-23  | 71%      | Zinc-dependent oxidoreductase                            |
|                                         | Swoo_2967          | <i>S. woodyi</i>               | 313       | 28%      | 46%        | 3.E-16  | 71%      | alcohol dehydrogenase (zinc containing)                  |
|                                         | Sden_2242          | <i>S. denitrificans</i> OS217  | 314       | 27%      | 41%        | 1.E-15  | 92%      | alcohol dehydrogenase                                    |
| Top 3 hits outside <i>Shewanella sp</i> | Y702_01970         | <i>Vibrio vulnificus</i> BAA87 | 313       | 71%      | 84%        | 1.E-168 | 99%      | alcohol dehydrogenase                                    |
|                                         | AAY54_06065        | <i>Vibrio metoecus</i>         | 313       | 70%      | 85%        | 1.E-167 | 99%      | alcohol dehydrogenase                                    |
|                                         | VEJY3_09035        | <i>Vibrio sp.</i> EJY3         | 313       | 70%      | 84%        | 3.E-166 | 99%      | alcohol dehydrogenase                                    |
| Known D-xylitol dehydrogenases          | Shal_2008          | <i>S. halifaxis</i>            | 344       | 22%      | 40%        | 8.E-07  | 68%      | alcohol dehydrogenase/putative xylitol dehydrogenase (1) |
|                                         | Spea_2286          | <i>S. pealeana</i>             | 344       | 22%      | 36%        | 1.E-05  | 61%      | alcohol dehydrogenase/putative xylitol dehydrogenase (1) |
|                                         | AGROH133_13378     | <i>Agrobacterium sp.</i> H13-3 | 345       | 21%      | 36%        | 1.E-05  | 49%      | Xylitol dehydrogenase                                    |

**Table S5.** Blast analysis of SO\_4230

|                                         | Protein/locus tag  | Organism                               | Size (aa) | Identity (%) | Similarity (%) | e-value | Coverage (%) | Function        |
|-----------------------------------------|--------------------|----------------------------------------|-----------|--------------|----------------|---------|--------------|-----------------|
|                                         | SO_4230 (Template) | <i>S. oneidensis</i> MR-1              | 494       |              |                |         |              | Glycerol kinase |
| Top 3 hits in <i>Shewanella sp</i>      | SHD_0561           | <i>S. decolorationis</i> S12           | 500       | 96           | 97             | 0       | 100          | Glycerol kinase |
|                                         | Shewana3_3756      | <i>Shewanella sp.</i> ANA-3            | 494       | 96           | 97             | 0       | 100          | Glycerol kinase |
|                                         | Shewmr4_3583       | <i>Shewanella sp.</i> MR-4             | 494       | 96           | 97             | 0       | 100          | Glycerol kinase |
| Top 3 hits outside <i>Shewanella sp</i> | Tola_0068          | <i>Tolomonas auensis</i> DSM 9187      | 497       | 75           | 87             | 0       | 99           | Glycerol kinase |
|                                         | WL1483_4080        | <i>Aeromonas shubertii</i>             | 504       | 75           | 86             | 0       | 99           | Glycerol kinase |
|                                         | AH4AK4_1492        | <i>Aeromonas hydrophilia</i> 4AK4      | 500       | 75           | 86             | 0       | 99           | Glycerol kinase |
| Known D-xylulokinases                   | M943_03795         | <i>Mycobacterium tuberculosis</i> EAI5 | 480       | 28           | 40             | 1.E-14  | 95           | Xylulokinase    |
|                                         | STM3660            | <i>Salmonella enterica</i>             | 484       | 24           | 42             | 4.E-26  | 89           | Xylulokinase    |
|                                         | ECs4447            | <i>Typhimurium Escherichia coli</i>    | 484       | 24           | 41             | 2.E-26  | 97           | Xylulokinase    |
|                                         | GlpK               | <i>Escherichia coli</i>                | 502       | 72           | 84             | 0       | 99           | Glycerol kinase |

**Table S6.** Comparison of protein characteristics of SO\_0900 and SO\_4230 with xylose reductase and xylulokinase from other organisms respectively.

| Metabolic function | Protein | Putative function   | Organism                         | Substrate | Specific activity (U/mg) | $K_m$ (mM)     | $V_{max}$ (U/mg) | Reference  |
|--------------------|---------|---------------------|----------------------------------|-----------|--------------------------|----------------|------------------|------------|
| Xylose reductase   | SO_0900 | Aldo/keto reductase | <i>S. oneidensis</i>             | Xylose    | $2.93 \pm 0.17$          | $93 \pm 7$     | $3.41 \pm 0.21$  | This study |
|                    | XR      | Aldo/keto reductase | <i>Zymomonas mobilis</i>         | Xylose    | $3.4 \pm 0.2$            | $258 \pm 43$   | $6.9 \pm 1.2$    | (2)        |
|                    | XR      | Xylose reductase    | <i>Pichia stipitis</i>           | Xylose    | 16.7                     | 42             | 16.7             | (3)        |
|                    | XR      | Xylose reductase    | <i>S. cerevisiae</i>             | Xylose    | 2                        | 142            | NA*              | (4)        |
|                    | XR      | Xylose reductase    | <i>Neospora crassa</i>           | Xylose    | 72.5                     | 34             | NA*              | (5, 6)     |
| Xylulokinase       | SO_4230 | Glycerol kinase     | <i>S. oneidensis</i>             | Xylulose  | $0.2 \pm 0.013$          | $1.7 \pm 0.12$ | $0.52 \pm 0.02$  | This study |
|                    | XK      | Xylulokinase        | <i>Escherichia coli</i>          | Xylulose  | 1.6                      | 0.3            | NA*              | (7, 8)     |
|                    | XK      | Xylulokinase        | <i>S. cerevisiae</i>             | Xylulose  | 3                        | 0.31           | 38.4             | (9)        |
|                    | XK      | Xylulokinase        | <i>Mucor circinelloides</i>      | Xylulose  | 10.8                     | 0.29           | 32               | (10, 11)   |
|                    | XK      | Xylulokinase        | <i>Pichia stipitis</i> NCYC 1541 | Xylulose  | 21.4                     | 0.52           | NA*              | (12)       |

Error values represent range of errors in duplicate samples. Substrate concentrations are given in brackets for respective specific activities

\*Not available



**Table S7.** Percentage pairwise identity matrix of SO\_1396<sup>Q207H</sup> amino acid sequence identified in the genomes of 15 *Shewanella* species.

|                  | 1      | 2      | 3      | 4      | 5      | 6      | 7      | 8      | 9      | 10     | 11     | 12     | 13     | 14     | 15     |
|------------------|--------|--------|--------|--------|--------|--------|--------|--------|--------|--------|--------|--------|--------|--------|--------|
| 1: Amazonensis   | 100.00 | 44.29  | 42.94  | 40.11  | 39.58  | 44.57  | 41.55  | 41.73  | 42.43  | 41.76  | 43.45  | 43.45  | 43.80  | 44.59  | 44.06  |
| 2: Haliotis      | 44.29  | 100.00 | 94.77  | 43.72  | 44.81  | 46.46  | 50.00  | 50.99  | 51.97  | 51.38  | 53.97  | 53.70  | 51.64  | 51.37  | 51.91  |
| 3: Algae         | 42.94  | 94.77  | 100.00 | 44.38  | 44.67  | 45.24  | 49.28  | 50.58  | 51.16  | 51.45  | 53.85  | 53.54  | 51.87  | 51.87  | 52.16  |
| 4: Woodyi        | 40.11  | 43.72  | 44.38  | 100.00 | 62.47  | 47.75  | 52.06  | 52.33  | 54.03  | 53.96  | 53.97  | 53.70  | 55.14  | 54.64  | 53.88  |
| 5: Piezotolerans | 39.58  | 44.81  | 44.67  | 62.47  | 100.00 | 50.27  | 52.07  | 53.39  | 54.31  | 53.47  | 53.97  | 53.97  | 53.77  | 53.77  | 54.02  |
| 6: Frigidimarina | 44.57  | 46.46  | 45.24  | 47.75  | 50.27  | 100.00 | 54.64  | 54.26  | 54.79  | 54.79  | 54.11  | 54.11  | 55.44  | 55.17  | 55.17  |
| 7: W3-18-1       | 41.55  | 50.00  | 49.28  | 52.06  | 52.07  | 54.64  | 100.00 | 85.79  | 86.58  | 86.40  | 75.98  | 75.98  | 72.11  | 71.61  | 72.61  |
| 8: Putrefaciens  | 41.73  | 50.99  | 50.58  | 52.33  | 53.39  | 54.26  | 85.79  | 100.00 | 91.62  | 91.62  | 76.06  | 76.06  | 71.93  | 71.93  | 71.68  |
| 9: Baltica       | 42.43  | 51.97  | 51.16  | 54.03  | 54.31  | 54.79  | 86.58  | 91.62  | 100.00 | 98.99  | 77.25  | 77.25  | 74.94  | 74.18  | 74.94  |
| 10: OS678        | 41.76  | 51.38  | 51.45  | 53.96  | 53.47  | 54.79  | 86.40  | 91.62  | 98.99  | 100.00 | 77.35  | 77.35  | 74.31  | 73.57  | 74.31  |
| 11: MR-1         | 43.45  | 53.97  | 53.85  | 53.97  | 53.97  | 54.11  | 75.98  | 76.06  | 77.25  | 77.35  | 100.00 | 99.73  | 80.82  | 81.37  | 81.64  |
| 12: XM1          | 43.45  | 53.70  | 53.54  | 53.70  | 53.97  | 54.11  | 75.98  | 76.06  | 77.25  | 77.35  | 99.73  | 100.00 | 80.55  | 81.10  | 81.64  |
| 13: ANA-3        | 43.80  | 51.64  | 51.87  | 55.14  | 53.77  | 55.44  | 72.11  | 71.93  | 74.94  | 74.31  | 80.82  | 80.55  | 100.00 | 94.93  | 95.17  |
| 14: MR-4         | 44.59  | 51.37  | 51.87  | 54.64  | 53.77  | 55.17  | 71.61  | 71.93  | 74.18  | 73.57  | 81.37  | 81.10  | 94.93  | 100.00 | 97.34  |
| 15: MR-7         | 44.06  | 51.91  | 52.16  | 53.88  | 54.02  | 55.17  | 72.61  | 71.68  | 74.94  | 74.31  | 81.64  | 81.64  | 95.17  | 97.34  | 100.00 |

## Supplementary References.

1. **Rodionov DA, Yang C, Li X, Rodionova IA, Wang Y, Obraztsova AY, Zagnitko OP, Overbeek R, Romine MF, Reed S, Fredrickson JK, Neilson KH, Osterman AL.** 2010. Genomic encyclopedia of sugar utilization pathways in the *Shewanella* genus. *BMC Genomics* **11**:494.
2. **Agrawal M, Chen RR.** 2011. Discovery and characterization of a xylose reductase from *Zymomonas mobilis* ZM4. *Biotechnol Lett* **33**:2127-2133.
3. **Verduyn C, Van Kleef R, Frank J, Schreuder H, Van Dijken JP, Scheffers WA.** 1985. Properties of the NAD(P)H-dependent xylose reductase from the xylose-fermenting yeast *Pichia stipitis*. *Biochem J* **226**:669-677.
4. **Krahulec S, Klimacek M, Nidetzky B.** 2012. Analysis and prediction of the physiological effects of altered coenzyme specificity in xylose reductase and xylitol dehydrogenase during xylose fermentation by *Saccharomyces cerevisiae*. *J Biotechnol* **158**:192-202.
5. **Rawat UB, Rao MB.** 1996. Purification, kinetic characterization and involvement of tryptophan residue at the NADPH binding site of xylose reductase from *Neurospora crassa*. *Biochimica Et Biophysica Acta-Protein Structure and Mol Enzymol* **1293**:222-230.
6. **Woodyer R, Simurdiak M, van der Donk WA, Zhao H.** 2005. Heterologous expression, purification, and characterization of a highly active xylose reductase from *Neurospora crassa*. *Appl Environ Microbiol* **71**:1642-1647.

7. **Wungsintaweekul J, Herz S, Hecht S, Eisenreich W, Feicht R, Rohdich F, Bacher A, Zenk MH.** 2001. Phosphorylation of 1-deoxy-D-xylulose by D-xylulokinase of *Escherichia coli*. Eur J Biochem **268**:310-316.
8. **Tritsch D, Hemmerlin A, Rohmer M, Bach TJ.** 2004. A sensitive radiometric assay to measure D-xylulose kinase activity. J Biochem Biophys Methods **58**:75-83.
9. **Richard P, Toivari MH, Penttila M.** 2000. The role of xylulokinase in *Saccharomyces cerevisiae* xylulose catabolism. FEMS Microbiol Lett **190**:39-43.
10. **Wungsintaweekul J.** 2001. Enzymes of the alternative terpenoid pathway in *Escherichia coli*. PhD thesis Technische Universitat Munchen, Munich.
11. **Komeda H, Yamasaki-Yashiki S, Hoshino K, Asano Y.** 2014. Identification and characterization of D-xylulokinase from the D-xylose-fermenting fungus, *Mucor circinelloides*. FEMS Microbiol Lett **360**:51-61.
12. **Flanagan T, Waites MJ.** 1992. Purification and characterization of D-Xylulokinase from the pentose-fermenting yeast *Pichia-Stipitis* Ncyc-1541. Enzyme Microb Technol **14**:975-979.
